# Supplementary material
Source: PubMed Central journal article supplement (PMC4826796)
Supplement: NIHMS727440-supplement-supplement_1.pdf [file NIHMS727440-supplement-supplement_1.pdf]

## Repository - Unmarked Text

### 1 **Method:**

2

3 **Generations of iIL-25Tg and *Il17rb*<sup>-/-</sup> Mice.** Murine *Il25* cDNA was inserted behind intestinal  
4 fatty acid-binding protein promoter (iFABP), and the expression plasmid was linearized by  
5 *EcoRI* digestion for the generation of iIL-25Tg mice<sup>1</sup>. For *Il17rb*<sup>-/-</sup> mice, a targeting vector was  
6 constructed to delete exons 5 to 11, resulting in the loss of the transmembrane and intracellular  
7 regions, as well as the alternative splicing isoforms of IL-17RB. Three independent iIL-25Tg  
8 founders and two *Il17rb*<sup>-/-</sup> founders were screened, selected, and backcrossed into the BALB/c  
9 background for more than ten generations. BALB/c and 4GET (*Il4*-IRES-eGFP; stock number  
10 004190) mice and *Stat6*<sup>-/-</sup> (stock number 002828) mice were purchased from the National  
11 Cancer Institute (Bethesda, MD, USA) and Jackson Laboratory, respectively, and maintained in  
12 our animal facility under specific pathogen-free conditions. *Il17rb*<sup>-/-</sup> mice were crossed with  
13 4GET mice to generate *Il17rb*<sup>-/-</sup>/4GET mice. *Il13*<sup>-/-</sup> mice were a kind gift of Dr. Andrew McKenzie.  
14 All genetically modified mice used in this study were backcrossed onto BALB/c background for  
15 more than ten generations. All mice were used at 8-9 weeks of age, and all experiments  
16 employed age- and gender-matched controls to account for any variations in data sets  
17 compared across experiments. All animal experiments were approved by the animal care and  
18 use committee of Cincinnati Children's Hospital Medical Center and performed in accordance  
19 with institutional guidelines.

20

21 **LP mononuclear cell isolation.** Small intestines were isolated, cut, and washed before  
22 vigorous vortexing to remove epithelial and intraepithelial cells. After enzyme digestion with  
23 collagenase A (Roche) and DNase I (Roche) at 37°C for 30 minutes and the removal of tissue  
24 debris, liberated cells were suspended in 44% Percoll and loaded on 67% Percoll for  
25 centrifugation. LP cells were collected from the interface for subsequent analysis.

26

## Repository - Unmarked Text

27 **Flow cytometry analysis and cell sorting.** LP cells from the small intestines were first stained  
28 with PE-conjugated anti-CD127 [A7R34], APC-conjugated anti-IL-17RB or anti-KLRG1  
29 [2F1/KLRG1], V500-conjugated anti-CD4 [GK1.5], PE-Cy7-conjugated anti-CD3e [145-2C11],  
30 FITC-conjugated anti-KLRG1 or GFP (for phenotype, anti-CD44 [IM7], CD62L [MEL-14], CD69  
31 [H1.2F3], Thy1.2 [30-H12], ICOS [C398.4A], and Sca-1 [D7]), biotinylated anti-T1/ST-2 [DJ8] or  
32 anti-CD127, and APC-Cy7-conjugated anti-c-KIT [2B8] antibodies. Subsequently, cells were  
33 counterstained with PerCP-Cy5.5-conjugated monoclonal antibodies against lineage (Lin)  
34 markers (CD11b [M1/70], CD11c [HL3], CD8 [53-6.7], B220 [RA3-6B2], Gr-1 [RB6-8C5], and  
35 CD335 [NKP46, 29A.4]) and with Brilliant Violet 421™ labeled Streptavidin (Biolegend) before  
36 analyses with a FACSCanton II (BD Bioscience) or cell sorting with a FACS Aria II (BD  
37 Bioscience). After lysis of red blood cells, peripheral blood cells were stained with Brilliant Violet  
38 421™ labeled Siglect-F, FITC-conjugated CCR3, APC-conjugated CD11b, and PerCP-Cy5.5-  
39 conjugated monoclonal antibodies against CD11c, CD4, CD8, B220, and Gr-1 for the analysis of  
40 blood eosinophils. For intracellular cytokine analyses, Lin<sup>+</sup> LP cells from BALB/c mice were  
41 labeled with microbeads conjugated with monoclonal antibodies against CD11b, CD8 $\alpha$ , and  
42 B220 and then removed with a MACS column (Miltenyi Biotech). After re-stimulation with  
43 PMA/ionomycin or IL-25 and treatment with Golgi blocker, enriched Lin<sup>-</sup> LP cells were stained  
44 with APC-conjugated anti-IL-17RB, APC-Cy7-conjugated anti-CD3e, V500-conjugated anti-  
45 CD4, PE-Cy7-conjugated anti-Fc $\epsilon$ R1 $\alpha$ , and biotinylated anti-IL-7R $\alpha$  antibodies. Subsequently,  
46 cells were counterstained with PerCP-Cy5.5-conjugated monoclonal antibodies against Lin  
47 markers as described above and with Brilliant Violet 42™-labeled Streptavidin. Stained cells  
48 were fixed and permeabilized for intracellular cytokine staining using FITC-conjugated anti-IFN-  
49  $\gamma$  [XMG 1.2] and PE-conjugated anti-IL-13 [eBio13A].

50

## Repository - Unmarked Text

51 **Measuring cytokines and mediators.** Sorted ILC2s ( $1 \times 10^4$ ) and  $CD4^+T_H2$  cells ( $1 \times 10^4$ ) from  
52 mice with active allergic diarrhea were cultured with IL-25 (50 ng/mL) in the presence or  
53 absence of IL-2 (50 ng/mL) and IL-7 (50 ng/mL) (R&D Systems) for 3 days. To examine IL-25  
54 responsiveness, enriched LP cells ( $3 \times 10^5$  cells per well) from the small intestines of wild-type or  
55 wild-type mice reconstituted with wild-type BM, *Rora*<sup>-/-</sup> BM or *Il17rb*<sup>-/-</sup> BM with or without active  
56 allergic diarrhea were cultured with IL-25 (50 ng/mL) in 96-well plates for 3 days before the  
57 collection of supernatants. In some experiments, sorted ILC2s ( $1 \times 10^4$  cells per well) from wild-  
58 type mice that were injected daily with 0.4  $\mu$ g recombinant mouse IL-25 (R&D Systems) for 4  
59 days were cultured with or without *in vitro*-derived  $CD4^+T_H2$  cells ( $4 \times 10^4$  cells per well) in the  
60 presence of IL-25 or IL-25 plus  $\alpha$ IL-2 monoclonal Abs (clone: S4B6-1, BioXcell) for 3 days  
61 before the collection of supernatants. Secreted cytokines in supernatants were assessed by  
62 ELISA kits for IL-4, IFN- $\gamma$  (BD Pharmingen), IL-5 (R&D Systems), and IL-13 (Antigenic  
63 American).

64

65 **RNA isolation and quantitative real-time PCR analysis.** RNA from sorted cell populations  
66 was isolated using an RNeasy Plus Mini kit (Qiagen) and served as templates to synthesize  
67 cDNA using iScript cDNA synthesis kit (Bio-rad). Quantitative real-time PCR analyses were  
68 performed with SYBR Green Chemistry (Applied Biosystems) in an ABI Prism 7900 detection  
69 system using previously described primer sets<sup>2-6</sup>, or the following primer sets: *Gapdh* (F5'-  
70 TGCACCACCAACTGCTTAGC, R5'-GGCAT GGACTGTGGTCATGAG), *Il13* (F5'-  
71 TGACCAACATCTCCAATTGCA, R5'-TTGTTATAAAGTG GGCTACTTCGATTT), *Il25* (F5'-  
72 TGTACCAGGCTGTTGCATTC, R5'-CTCCACTTCAGCCACTCCTC), *Tarc* (F5'-  
73 CAGGAAGTTGGTGAGCTGGT, R5'-GGGTCTGCACAGATGAGCTT), *Cxcl1* (F5'-  
74 TAGGGTGAGGACATGTGTGG, R5'-AAATGTCCAAGGGAAGCGT), *Ccl11* (eotaxin 1, F5'-  
75 CCCAACTCCTGCTGCTTTA, R5'-AGATCTCTTTGCCCAACCTG), and *Ccl24* (eotaxin 2, F5'-

## Repository - Unmarked Text

76 CTCCTTCTCCTGGTAGCCTGCG, R5'-GTGATGAAGATGACCCCTGCCTT). Expression levels  
77 of target genes were normalized to endogenous *Gapdh* transcript levels, and relative  
78 quantification of samples was compared to the lowest expression levels as the baseline.

## Repository - Unmarked Text

### 79 Reference:

- 80 1. Sweetser DA, Hauff SM, Hoppe PC, Birkenmeier EH, Gordon JI. Transgenic mice  
81 containing intestinal fatty acid-binding protein-human growth hormone fusion genes  
82 exhibit correct regional and cell-specific expression of the reporter gene in their small  
83 intestine. Proceedings of the National Academy of Sciences of the United States of  
84 America 1988; 85:9611-5.
- 85 2. Forbes EE, Groschwitz K, Abonia JP, Brandt EB, Cohen E, Blanchard C, et al. IL-9- and  
86 mast cell-mediated intestinal permeability predisposes to oral antigen hypersensitivity.  
87 The Journal of experimental medicine 2008; 205:897-913.
- 88 3. Yamashita N, Tashimo H, Ishida H, Matsuo Y, Tamauchi H, Terashima M, et al.  
89 Involvement of GATA-3-dependent Th2 lymphocyte activation in airway  
90 hyperresponsiveness. American journal of physiology. Lung cellular and molecular  
91 physiology 2006; 290:L1045-51.
- 92 4. Kashiwakura J, Xiao W, Kitaura J, Kawakami Y, Maeda-Yamamoto M, Pfeiffer JR, et al.  
93 Pivotal advance: IgE accelerates in vitro development of mast cells and modifies their  
94 phenotype. Journal of leukocyte biology 2008; 84:357-67.
- 95 5. Swaidani S, Bulek K, Kang Z, Liu C, Lu Y, Yin W, et al. The critical role of epithelial-  
96 derived Act1 in IL-17- and IL-25-mediated pulmonary inflammation. Journal of  
97 immunology 2009; 182:1631-40.
- 98 6. Park KW, Waki H, Villanueva CJ, Monticelli LA, Hong C, Kang S, et al. Inhibitor of DNA  
99 binding 2 is a small molecule-inducible modulator of peroxisome proliferator-activated  
100 receptor-gamma expression and adipocyte differentiation. Mol Endocrinol 2008;  
101 22:2038-48.

102

103

## Repository - Unmarked Text

### 104 **FIGURE LEGENDS**

105

106 **FIG E1.** (A) Detection of and phenotypic analysis of CD3<sup>+</sup>CD4<sup>+</sup> T cells in LP of small intestine of  
107 IL-4-eGFP (4GET) mice after six intragastric OVA challenges. (B) Measurements by ELISA of  
108 indicated cytokines secreted by sorted indicated T cell subsets (100x10<sup>3</sup> cells) after stimulation  
109 with CD3 and CD28 for 24hrs. (C) Expression of the indicated genes by intestinal ILC2,  
110 CD4<sup>+</sup> TH2 cells, eosinophils, and a panel of other indicated hematopoietic cell lineages from the  
111 spleens of mice with active allergic diarrhea, as well as by *in vitro*-generated bone marrow-  
112 derived mast cells (BMMCs), was analyzed by quantitative real-time PCR using primers  
113 referenced in the methods. Data are expressed as relative fold difference and represent one of  
114 three independent experiments. mDC, myeloid dendritic cells (CD11c<sup>hi</sup>CC11b<sup>hi</sup>CD4<sup>+</sup>); pDC,  
115 plasmacytoid dendritic cells (CD11c<sup>med</sup>CD11b<sup>-</sup>Gr-1<sup>+</sup>B220<sup>+</sup>). Data represent one of three  
116 independent experiments. Error bars denote mean ± S.E.M. \* p<0.05, \*\*p≤ 0.01. ns, not  
117 significant.

118

119 **FIG E2** (A) Phenotype of Lin<sup>-</sup>IL-17RB<sup>+</sup>c-KIT<sup>-</sup> and Lin<sup>-</sup>IL-17RB<sup>-</sup>c-KIT<sup>+</sup> in lamina propria (LP) of the  
120 small intestine from mice with experimental food allergy was analyzed using flow cytometry. (B)  
121 Detection and frequency of ILC2s in mesenteric lymph node of BALB/c mice injected with reco  
122 mbinant IL-25 (0.5 mg) for 4 consecutive days. Filled histograms represent the staining of indica  
123 ted markers on indicated cell subsets (A); open histograms represent isotype control. Data repre  
124 sent one of three independent experiments (n=4 mice per group). Error bars denote mean ± S.E.  
125 M. \*\*p≤ 0.01.

126

127 **FIG E3** Origin of intestinal ILC2s and CD4<sup>+</sup>T<sub>H</sub>2 cells in irradiated recipient mice after reconstituti  
128 on in a murine model of food allergy. (A) Diagram of adoptive transfer protocol in the mouse mo  
129 del of food allergy. (B, C) Detection (B) and frequency (C) of donor-derived ILC2s (Lin<sup>-</sup>IL-17RB<sup>-</sup>c

## Repository - Unmarked Text

130 -Kit<sup>+</sup>Thy1.1<sup>lo/hi</sup>Thy1.2<sup>-</sup>) and recipient-derived CD4<sup>+</sup>Thy1.1<sup>-</sup>Thy1.2<sup>+</sup> T cells in the small intestine of  
131 irradiated recipient Thy1.2<sup>+</sup> wild type (WT) or *STAT6*<sup>-/-</sup> BALB/c mice reconstituted with bone marrow  
132 progenitors from WT Thy1.1<sup>+</sup> BALB/c mice after six intragastric OVA challenges. Data represent  
133 one of three independent experiments (n=4 mice per group). LP, lamina propria. ns, not significant.  
134

135

136 **FIG E4.** (A) Measurement of indicated cytokines produced by lamina propria cells of naïve or  
137 mice developed experimental food allergy after culture with medium only or OVA<sub>323-339</sub> peptides  
138 (10 $\mu$ M) for 3 days by ELISA. (B) Measurement of IL-5 and IL-13 production by ILC2s, CD4<sup>+</sup>T<sub>H</sub>2  
139 cells, or ILC2s co-cultured with CD4<sup>+</sup>T<sub>H</sub>2 cells after stimulation with OVA<sub>323-339</sub> peptides, IL-25, or  
140 both for 3 days by ELISA. Data is the representative of two independent experiments. Error bars  
141 denote mean  $\pm$  S.D. \*\*p  $\leq$  0.01; \*\*\*p  $\leq$  0.001. ND, not detected; ns, not significant.

142

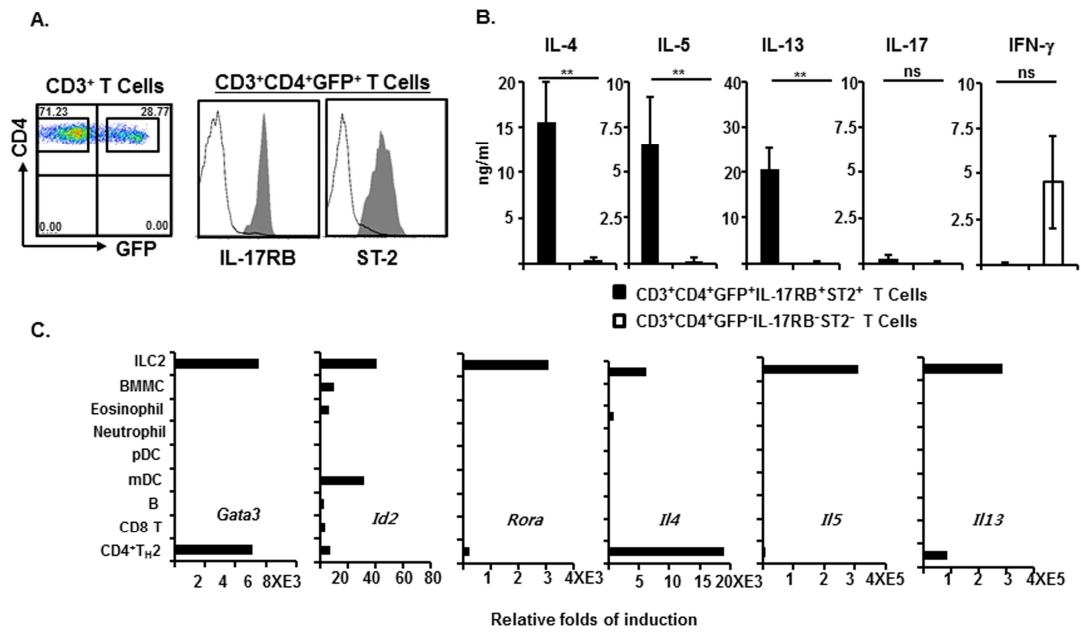

**FIG E1**



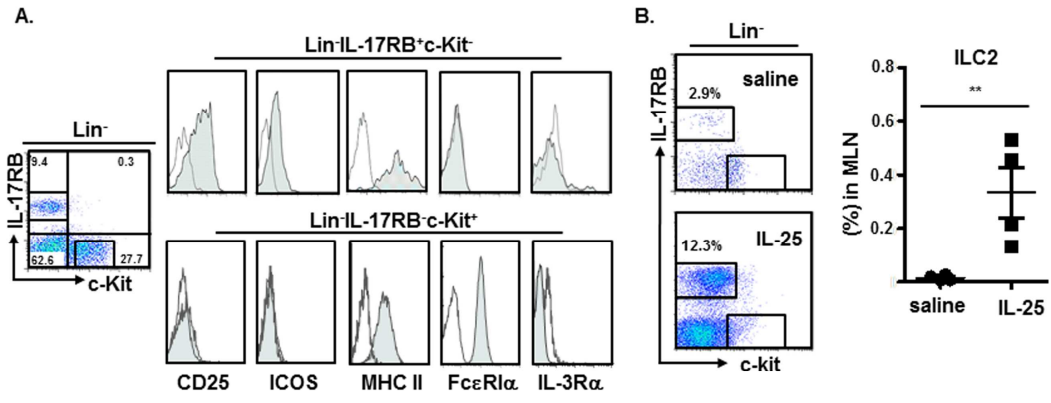

**FIG E2**

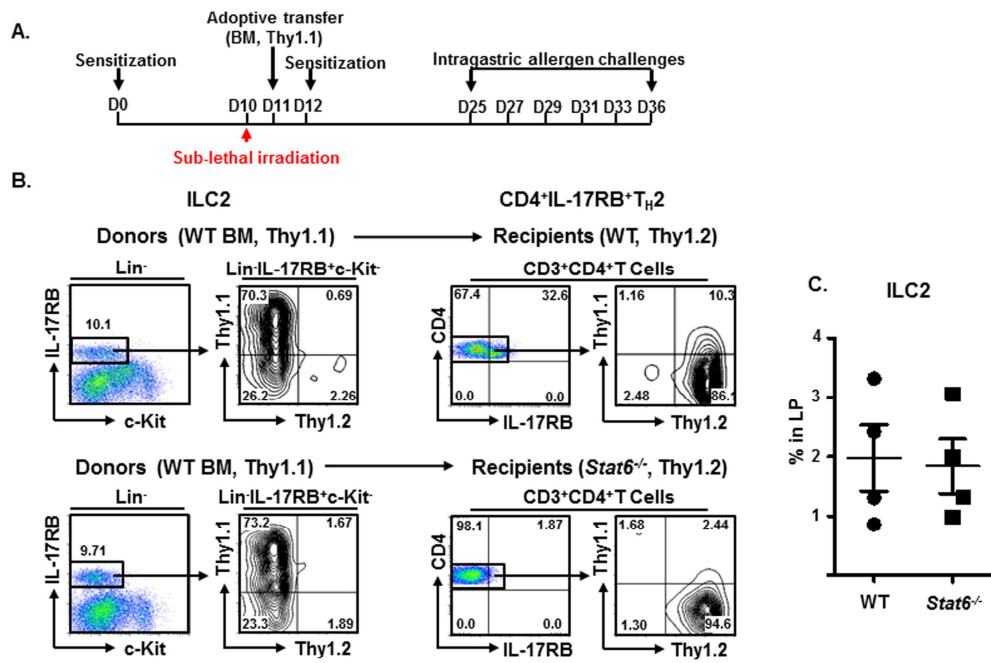

**FIG E3**

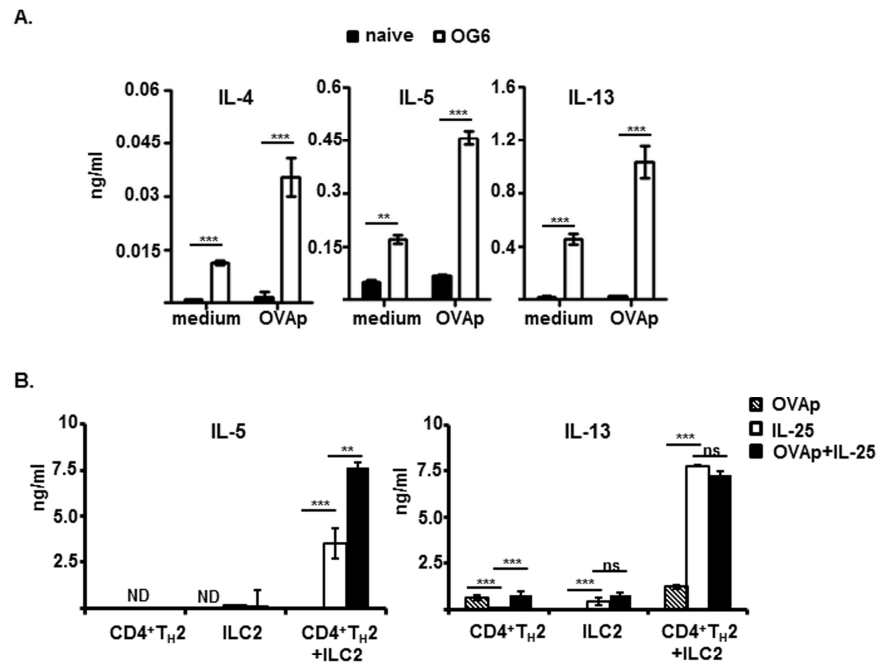

**FIG E4**
